# Supplementary material for: Combining Novel Hormonal Therapies with a Poly (ADP-Ribose) Polymerase Inhibitor for Metastatic Castration-Resistant Prostate Cancer: Emerging Evidence
Source: MDPI journal article supplement (doi:10.3390/curroncol30120751), 2023-12-04
Supplement: s1 [file s1]

**Supplemental Table S2.** Sensitive analyses of the MAGNITUDE trial for patients received AAP in the mCRPC setting. AAP=Abiraterone Acetate plus Prednisone; HR=Hazard Ratio; N=Number; CI=Confidence Interval; HRR=Homologous Recombination Repair; HRR m=HRR mutation; BRCA1/2 m=BRCA1/2 mutation.

| Cohort    | Subgroup            | N   | HR   | 95%CI        | Median rPFS, months |             |
|-----------|---------------------|-----|------|--------------|---------------------|-------------|
|           |                     |     |      |              | Niraparib+AAP       | Placebo+AAP |
| HRR m     | No prior AAP        | 325 | 0.72 | (0.55, 0.96) | 19.4                | 11.2        |
|           | AAP $\leq$ 2 months | 58  | 0.69 | (0.36, 1.30) | 13.9                | 11.1        |
|           | AAP > 2 months      | 40  | 1.47 | (0.66, 3.30) | 13.1                | 16.5        |
| BRCA1/2 m | No prior AAP        | 166 | 0.48 | (0.32, 0.71) | 19.6                | 8.4         |
|           | AAP $\leq$ 2 months | 36  | 0.67 | (0.27, 1.47) | 13.9                | 11.1        |
|           | AAP > 2 months      | 23  | 1.20 | (0.30, 4.80) | NR                  | 24.9        |
