# Supplementary material for: Combining Novel Hormonal Therapies with a Poly (ADP-Ribose) Polymerase Inhibitor for Metastatic Castration-Resistant Prostate Cancer: Emerging Evidence
Source: MDPI journal article supplement (doi:10.3390/curroncol30120751), 2023-12-04
Supplement: s1 [file s1]

**Supplemental Table S1.** Information of Included records.

| Reference                                                                                                     | NCT Number  | Acronym   |
|---------------------------------------------------------------------------------------------------------------|-------------|-----------|
| <b>Publications</b>                                                                                           |             |           |
| Chi KN et al. J Clin Oncol. 2023;O2201649                                                                     | NCT03748641 | MAGNITUDE |
| Clarke NW et al. NEJM Evid. 2022;1:10.1056/EVIDoa2200043                                                      | NCT03732820 | PROpel    |
| Agarwal N et al. Lancet. 2023;402:291-303                                                                     | NCT03395197 | TALAPRO-2 |
| <b>ASCO-GU abstracts</b>                                                                                      |             |           |
| Castro E et al. J Clin Oncol. 2023.41.6_suppl.172                                                             | NCT03748641 | MAGNITUDE |
| Efstathiou E et al. J Clin Oncol. 2023.41.6_suppl.170                                                         | NCT03748641 | MAGNITUDE |
| Clarke NW et al. J Clin Oncol. 2023.41.6_suppl.LBA16                                                          | NCT03732820 | PROpel    |
| Agarwal N et al. J Clin Oncol. 2023.41.6_suppl.LBA17                                                          | NCT03395197 | TALAPRO-2 |
| Rao A et al. J Clin Oncol. 2023.41.6_suppl.TPS277                                                             | NCT04455750 | CASPAR    |
| <b>On-going Clinical Trials</b>                                                                               |             |           |
| <a href="https://clinicaltrials.gov/ct2/show/NCT04455750">https://clinicaltrials.gov/ct2/show/NCT04455750</a> | NCT04455750 | CASPAR    |
